1 **Title: Comparison of surgical versus medical termination of pregnancy between**  
2 **13-20 weeks of gestation in Ethiopia: A quasi-experimental study.**

3 **Tesfaye H. Tufa<sup>1,\*</sup>, Sarah Prager<sup>1,2</sup>, Mekitie Wondafrash<sup>1</sup>, Shikur Mohammed<sup>3</sup>**

4 **Nicole Byl<sup>4</sup>, Jason Bell<sup>5</sup>**

5

6 \*Corresponding author,

7 1- Department of Obstetrics and Gynecology, Saint Paul's Hospital Millennium

8 Medical College, Addis Ababa Ethiopia

9 2- Department of Obstetrics & Gynecology, University of Washington, Seattle,

10 Washington, USA

11 3- Department of Public Health, Saint Paul's Hospital Millennium Medical College,

12 Addis Ababa Ethiopia

13 4- University of Michigan Medical School, Ann Arbor, Michigan USA

14 5- Department of Obstetrics & Gynecology, University of Michigan, Ann Arbor,

15 Michigan USA

16

17 **Corresponding author information**

18 Tesfaye H. Tufa

19 Addis Ababa, Ethiopia, Swaziland Street, 1271

20 Email: [tesfaye.hurisa@sphmmc.edu.et](mailto:tesfaye.hurisa@sphmmc.edu.et)

21 Phone number: +251911926336

## 22 **Abstract**

## 23 **Background**

24 Dilation and evacuation is a method of second trimester pregnancy termination  
25 introduced recently in Ethiopia. However, little is known about the safety and  
26 effectiveness of this method in an Ethiopian setting. Therefore, the study is intended to  
27 determine the safety and effectiveness of dilation and evacuation for surgical abortion  
28 as compared to medical abortion between 13-20 weeks' gestational age.

## 29 **Methods**

30 This is a quasi-experimental study of women receiving second trimester termination of  
31 pregnancy between 13-20 weeks. Patients were allocated to either medical or surgical  
32 abortion based on their preference. A structured questionnaire was used to collect  
33 demographic information and clinical data upon admission. Procedure related  
34 information was collected after the procedure was completed and before the patient was  
35 discharged. Additionally, women were contacted 2 weeks after the procedure to  
36 evaluate for post-procedural complications. The primary outcome of the study was a  
37 composite complication rate. Data were collected using Open Data Kit and then  
38 analyzed using Stata version 14.2. Univariate analyses were performed using means  
39 (standard deviation), or medians (interquartile range) when the distribution was not  
40 normal. Multivariate logistic regression was also performed to control for confounders.

## 41 **Results**

42 Two hundred nineteen women chose medical abortion and 60 chose surgical abortion.  
43 The composite complication rate is not significantly different among medical and

44 surgical abortion patients (15% versus 10%;  $p=0.52$ ). Nine patients (4.1%) in the  
45 medical arm required additional intervention to complete the abortion, while none of the  
46 surgical abortion patients required additional intervention. Median (IQR) hospital stay  
47 was significantly longer in the medical group at 24 (12-24) hours versus 6(4-6) hours in  
48 the surgical group  $p<0.001$ .

## 49 **Conclusion**

50 From the current study findings, we concluded that there is no difference in safety  
51 between surgical and medical methods of abortion. This study demonstrates that  
52 surgical abortion can be used as a safe and effective alternative to medical abortion and  
53 should be offered equivalently with medical abortion, per the patient's preference.

54 **Keywords: Dilation and evacuation, Second Trimester, Medical abortion, Ethiopia**

## 55 **Background**

56 Worldwide, termination of pregnancy is one of the most common procedures for  
57 reproductive aged women [1,2]. Abortion is safe when provided by a trained person  
58 using recommended techniques [3]. Despite limited evidence in developing countries,  
59 the safety of both surgical and medical methods of abortion in the second trimester is  
60 well demonstrated worldwide [4]. Both medical and surgical abortion have evolved to  
61 improve in effectiveness, acceptability, and rate of complications [5].

62 In countries with broadly accessible abortion services, most abortions occur in the first  
63 trimester [6]. Often, second trimester abortion is the only option available to women for  
64 many reasons, including but not limited to poor access to services and fear of disclosure  
65 of pregnancy [7–10].

66 Medical termination of pregnancy involves the use of medications (mifepristone and  
67 misoprostol) to cause the uterus to expel the pregnancy while surgical abortion involves  
68 preparing the cervix with mechanical or medical methods followed by dilation and  
69 evacuation (D&E) using instruments within the uterus (3,10).

70 Historical and contemporary studies have compared modern medical and surgical  
71 methods of termination of pregnancy resulting in a continued debate about the optimal  
72 method of second trimester abortion. Many studies show increased safety and  
73 effectiveness with surgical abortion, though others show a slight increase in the risk of  
74 fever requiring antibiotics with surgical abortion [12–15].

75 Motivated by the high rate of maternal death associated with unsafe abortion, Ethiopia  
76 adopted a legal reform in 2005 which expanded indications for safe abortion service  
77 [16]. Some of the indications in the new law include pregnancy as a result of rape or  
78 incest, fetal congenital abnormality, presence of physical and mental disabilities for the  
79 patient, and others [16]. Currently, the available working document in the country  
80 considers dilation and evacuation a second line of management in the second trimester,  
81 to be used only when there is a failed medical abortion [17].

82 Following the recent creation of a family planning fellowship program in a tertiary  
83 academic institution, St Paul's Hospital Millennium Medical College (SPHMMC), started  
84 offering both medical and surgical abortion options up to 20 weeks' gestational age. A  
85 review of 46 cases of D&E in the same institution demonstrated clinical safety with an  
86 overall complication rate of 2.3% [18]. This method of abortion newly introduced in the  
87 Ethiopian setting has a very low uptake, partly due to fear of acute complications and  
88 lack of robust evidence demonstrating effectiveness and safety in an Ethiopian context.

89 Currently, no published data compare medical and surgical abortion in Ethiopia. This  
90 study aims to demonstrate the comparative safety and efficacy of medical and surgical  
91 abortion between 13-20 gestational weeks.

92

## 93 **Materials and Methods**

### 94 **Study design and study participants**

95 A non-equivalent comparison group, quasi-experimental design was employed to  
96 include patients who were undergoing elective termination of pregnancy from 13-20  
97 gestational weeks between November 1, 2018 and October 31, 2019. The study was  
98 conducted at Saint Paul's Hospital Millennium Medical College (SPHMMC), a tertiary  
99 referral and teaching hospital in Addis Ababa, Ethiopia.

### 100 **Second trimester safe abortion standard of care in the institution**

101 All patients with a gestational age between 13-20 weeks are fully counseled on the risks  
102 and benefits and given the option of medical or surgical abortion. Those who choose  
103 medical abortion receive mifepristone 200 mg on day 1 and are appointed to return to  
104 SPHMMC 24-48 hours later for admission and misoprostol administration. Those who  
105 chose surgical abortion are given mifepristone 200 mg with or without laminaria and  
106 appointed to return the next day for surgical abortion. The decision to prepare the cervix  
107 with laminaria is made based on the gestational age. Those with advanced gestational  
108 age (>16 weeks) receive laminaria on the same day they receive mifepristone.  
109 Gestational age is determined by ultrasound using a composite calculation including the  
110 fetal parameters of head circumference, biparietal diameter and femoral length). The

111 ultrasound findings are documented in the clinical chart. During the procedure, both  
112 medical and surgical abortion patients receive pain medication.

113 In the study, all women presenting for abortion care (medical or surgical) were  
114 approached by the study team to ascertain willingness to participate in the study. The  
115 inclusion criteria for enrollment were, I) gestational age between 13 – 20 weeks  
116 confirmed with ultrasound, II) age  $\geq 18$  years, III) willingness to provide informed consent  
117 for the study, IV) having a working phone and willingness to be contacted for a follow-up  
118 questionnaire 2 weeks after the procedure.

119 The study team provided interested patients with an overview of the study and the  
120 consent form, which they signed. Patients were interviewed by trained data collectors in  
121 their preferred language. A standardized questionnaire was written in English and  
122 translated into a local language (Amharic). Baseline sociodemographic and clinical  
123 information were collected upon admission to the hospital. The remaining procedure-  
124 related information was collected after they recovered from the abortion procedure.  
125 Enrolled patients were followed throughout their time in the hospital for immediate  
126 complications or side effects related to the abortion procedure. Procedure-related  
127 information, including the decision for post-procedure observation, need and indication  
128 for additional intervention, and family planning related information, was abstracted from  
129 the provider's note in the clinical chart. After discharge, patients were contacted via  
130 phone to answer follow-up questions.

131 The primary outcome of the study was a composite complication rate, defined as the  
132 presence of one of the following complications: bleeding requiring observation, genital  
133 tract lacerations requiring repair, need for additional intervention to complete the

134 abortion procedure, and one or more symptoms of pelvic infection at the time of follow  
135 up. We also assessed for the presence of other serious maternal complications  
136 including continued bleeding for more than two weeks, additional major surgery  
137 (laparotomy), and death. Also assessed were duration of hospital stay, degree of pain  
138 related to abortion procedure, acceptability of the procedure (as measured by patient  
139 satisfaction) and recommendation of the procedure to others. We based our sample  
140 size calculation on the composite complication rate of a previous cross-sectional study  
141 conducted in the same institution [18]. We assumed a clinically meaningful difference in  
142 composite complication rate of 15% between the groups with 80% power and a two-  
143 sided alpha of 0.05. Considering the low uptake of surgical abortion in the institution, we  
144 planned for a 3:1 ratio of medical versus surgical abortions. Given these assumptions,  
145 we needed at least 54 surgical and 162 medical abortion cases. Based on prior  
146 numbers of abortions performed in the hospital, we anticipated a one-year data  
147 collection would be sufficient to meet our sample size requirements.

148 The data were collected with open data kit then imported into Stata version 14.2 for data  
149 processing and analysis. Univariate analyses were performed using proportions and  
150 means (standard deviation), or medians (interquartile range) when the distribution was  
151 not normal. The different outcomes were compared between medical and surgical  
152 abortion procedure groups using Fisher's exact test, independent t-test, or the non-  
153 parametric test of difference of means (Mann Whitney U test). A multiple logistic  
154 regression model was fitted to determine independent predictors of post-procedure  
155 complications while adjusting for measured confounding variables.

156

157 **Results**

158 During the study period, a total of 279 women were included in the study, with 219 in  
159 the medical group and 60 in the surgical group (Figure.1).

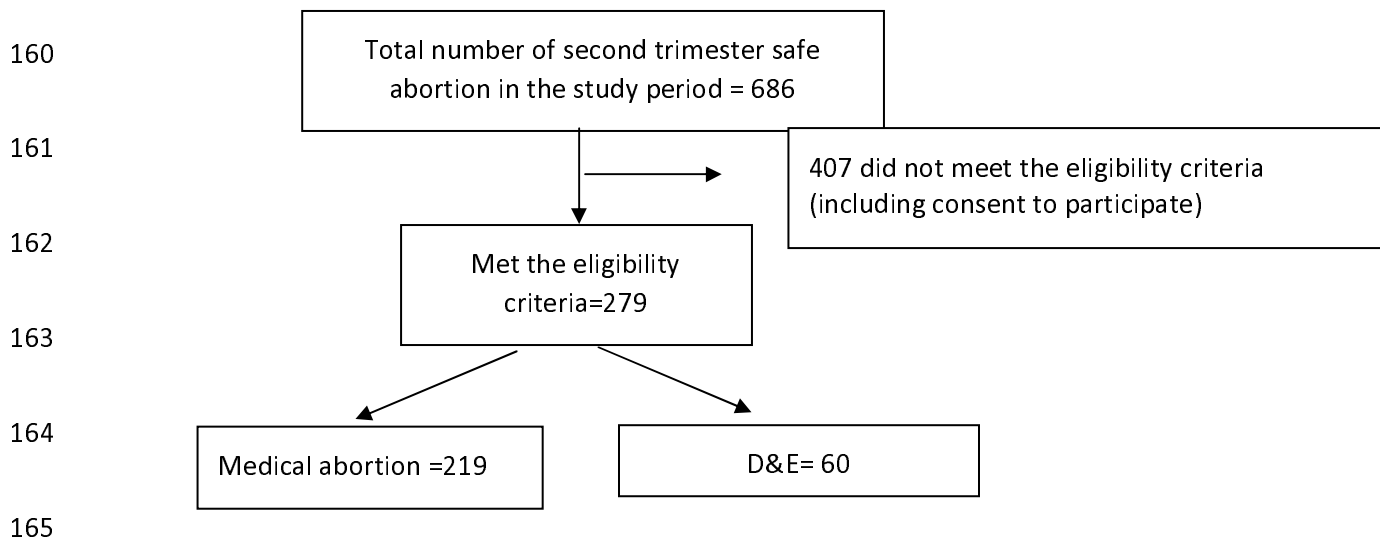

166 **Figure 1. Flow chart of patient enrollment.**

167 The baseline demographic characteristics for the two groups are similar except for age,  
168 place of residence, and prior delivery (Table 1). Significantly more patients in the  
169 surgical arm are older, live outside of Addis Ababa, and have had a prior vaginal  
170 delivery ( $p < 0.05$ ). Other clinical characteristics, including gestational age, were similar  
171 between the groups.

172 All patients in the medical arm received mifepristone 24-48 hours prior to misoprostol.  
173 Two hundred fifteen patients (98.2%) received misoprostol 400 micrograms every 3  
174 hours, while four patients (1.8%) received a loading dose of 800 microgram misoprostol,  
175 then 400 micrograms every three hours. Sublingual was the most common route of  
176 administration for misoprostol (88.6%).



177 Ninety-eight percent (59/60) of patients in the surgical arm received mifepristone on day  
178 one. In addition to the mifepristone, surgical patients either received laminaria only  
179 (13.3%), misoprostol only (56.7%), or both laminaria and misoprostol (30.0%) for  
180 cervical priming prior to dilation and evacuation.

181 One hundred forty-four women in the medical arm (65.8%) received analgesia.  
182 Diclofenac and Ibuprofen were the most common analgesics used for medical  
183 abortions, accounting for 50% and 36.8% respectively. Other analgesics used were  
184 tramadol and paracetamol. All patients in the surgical arm received a paracervical block,  
185 and 53 (91.4%) additionally received diclofenac. Other pain medications used for  
186 surgical abortion were Diazepam and Pethidine (Table 2).

187 The composite complication rate among medical abortion patients is not significantly  
188 different than that of surgical abortion patients (15% versus 10%;  $p=0.52$ ). Nine patients  
189 (4.1%) in the medical arm required additional intervention (manual vacuum aspiration)  
190 to complete the abortion, while all patients in the surgical arm completed the procedure  
191 without a need for additional intervention. More patients in the surgical arm were  
192 observed for bleeding (8.3% versus 1%;  $p< 0.002$ ). Despite this, no patients in either  
193 arm required transfusion or any other medical or surgical intervention to control  
194 bleeding. There were no genital tract lacerations requiring repair in either arm and no  
195 maternal deaths reported during the study period.

196 We considered possible confounders and performed multivariate logistic regression to  
197 compare the composite complication rate between the medical and surgical arms and  
198 found no significant difference between the groups after controlling for measured  
199 confounders (Table 4).

200 Medical abortion was associated with a significantly longer median hospital stay (24  
201 hrs., IQR 12-24 hrs.) as compared to surgical abortion (6 hrs., IQR 4-6 hrs.;  $p < .001$ ).  
202 The surgical patients were more likely than the medical patients to recommend the  
203 same procedure to others (98.3% vs 84.0%;  $p = 0.003$ ).

204 All patients in both the medical and surgical arms were counseled on family planning  
205 and 92% (257/279) received some form of family planning. The majority of the patients  
206 chose and received long acting reversible methods, with Nexplanon, IUD and Jadelle  
207 contributing nearly 86% of the total contraception methods adopted (Figure 2).

## 208 **Discussion**

209 The low complication rate in our study demonstrates that both medical and surgical  
210 abortion between 13-20 weeks can be safely practiced in an Ethiopian setting. Similar to  
211 other studies, the need for additional interventions to complete the abortion, occurred  
212 more frequently in the medical group [8,14,15,19–21]. At the time of the 2-week follow  
213 up enquiry, both ongoing bleeding and symptoms of pelvic infection were similar  
214 between the two groups.

215 All surgical abortion patients received prophylactic antibiotics and some form of pain  
216 medication during the abortion procedure. Conversely, only 65.8% of medical abortion  
217 patients received pain medication, which may explain the higher reports of moderate to  
218 severe pain in the medical as compared to the surgical arm. This reveals the need for  
219 standardization of pain management, especially for medical abortion. Additionally,  
220 further investigation is needed to identify the reasons for lower pain medication  
221 administration among women undergoing a medical abortion.

222 The median duration of stay is significantly shorter in the surgical abortion group. This  
223 finding is consistent with other studies [11,14]. Interestingly, patients who came from  
224 outside Addis Ababa were more likely to choose the surgical procedure, possibly to  
225 avoid the prolonged hospital stay associated with medical abortion. Similar to other  
226 studies, the mean satisfaction rate (scored from 0-8) between the groups is equivalent  
227 (7.56 vs 7.90;  $p=0.995$ ) (3, 19–21). Importantly, this study found that 42.3% of all  
228 patients were referred from nearby health institutions. As our hospital is a center of  
229 excellence for abortion care, it is good that nearby institutions know where/how to refer  
230 patients for abortion. Alternatively, this also indicates a need for capacity building at  
231 nearby health centers to reduce/avoid unnecessary delays in receiving care. Integrating  
232 D&E training into medical schools and residency programs is one way to build capacity  
233 and potentially address these delays. Finally, the high rate of family planning counseling  
234 and provision demonstrates the successful integration of family planning into abortion  
235 care at the institution.

### 236 **Strengths and limitations**

237 This study is the first in Ethiopia to compare and report the safety and efficacy of  
238 surgical versus medical abortion. The study enrolled adequate numbers of patients in  
239 the medical and surgical arms during the study period. Saint Paul's Hospital Millennium  
240 Medical College is the only public institution so far in the country providing D&E for  
241 abortion patients, and only recently started this practice, together with the initiation of a  
242 family planning fellowship for graduates of an OBGYN residency program. This study  
243 demonstrates that D&E can be safely and effectively initiated and practiced in other  
244 similar Ethiopian settings.

245 The study has several limitations. Study subjects were not randomized to abortion  
246 methods, which introduces selection bias, as revealed by the proportion of patients from  
247 outside Addis Ababa who chose surgical abortion. Our study limited the comparison to  
248 cases between the gestational age of 13-20 weeks and cannot be generalized to  
249 abortion before 13 or beyond 20 weeks' gestation. The study is performed in an  
250 established academic institution where there is a family planning fellowship program  
251 and should not be generalized to other hospitals that lack sufficient training and  
252 oversight in surgical abortion. Significantly fewer patients chose surgical abortion during  
253 the study period. Further investigation into reasons for this is needed to identify  
254 knowledge gaps and make recommendations.

## 255 **Conclusion**

256 Our study demonstrates that surgical abortion is a safe and effective alternative to  
257 medical abortion in our institution. We hope these results will inform the current national  
258 technical guidelines, which currently consider second trimester surgical abortion a  
259 backup method only. Instead, surgical abortion should be a first line option for patients,  
260 along with medical abortion.

261 Attempts to expand the family planning fellowship program and train more providers in  
262 Ethiopia to perform surgical abortion should be part of any strategy to improve care.

## 263 **Acknowledgment**

264 Our deepest appreciation goes to SPHMMC nurses and midwives working in the  
265 abortion procedure room who devoted their time and energy to a continued quality of  
266 care for abortion patients. We also want to thank SPHMMC's Center of Excellence in

267 Reproductive Health for supporting the research. We deeply appreciate Dr. Soe Soe  
268 Thwin for her revisions and technical input.

### 269 **Funding statement**

270 The research received grant from Saint Paul's Hospital Millennium Medical College,  
271 Addis Ababa, Ethiopia.

### 272 **Competing Interest**

273 The authors declare no competing interests.

### 274 **Consent for publication**

275 Not applicable

### 276 **Availability of data and materials**

277 The primary dataset used in the study is not publicly available. In case it is needed, the  
278 data can be obtained from the corresponding author upon reasonable request.

### 279 **Contribution of the authors**

280 TT: Conceived and conducted the study, managed the data, performed the statistical  
281 analysis and write up the manuscript, JB: Overall supervision for the entire process of  
282 study planning, implementing, manuscript writing, MW: Statistical analysis, data  
283 interpretation, Critical revision of the manuscript. SP: Overall supervision for the entire  
284 process of study planning, implementing, manuscript writing, SM: Overall supervision  
285 for the entire process of study planning, implementing, manuscript writing, NB: Critical  
286 revision and Manuscript editing

287 **Ethics approval and consent to participate**

288 Ethical approval was received from the ethical review board at SPHMMC and  
289 permission to perform the research was obtained from the head of the department of  
290 obstetrics and gynecology. The study was conducted after receiving an official letter of  
291 clearance from SPHMMC ethical review committee.

292 Informed consent was obtained from all the surveyed women prior to the interview.

293

294

295 **References**

- 296 [1] Jones RK, Zolna MR, Henshaw SK, Finer LB. Abortion in the United States:  
297 incidence and access to services, 2005. *Perspect Sex Reprod Health* 2008;40:6–  
298 16.
- 299 [2] Moore AM, Gebrehiwot Y, Fetters T, Wado YD, Bankole A, Singh S, et al. The  
300 Estimated Incidence of Induced Abortion in Ethiopia, 2014: Changes in the  
301 Provision of Services Since 2008. *Int Perspect Sex Reprod Health* 2016;42:111–  
302 20. <https://doi.org/10.1363/42e1816>.
- 303 [3] Safe abortion: technical and policy guidance for health systems. *Reprod Health*  
304 *Matters* 2012;20:205–7. [https://doi.org/10.1016/S0968-8080\(12\)39623-7](https://doi.org/10.1016/S0968-8080(12)39623-7).
- 305 [4] Grimes DA, Schulz KF. Morbidity and mortality from second-trimester abortions. *J*  
306 *Reprod Med* 1985;30:505–514.
- 307 [5] Sedgh G, Henshaw S, Singh S, VAhman E, Shah IH. Induced abortion: estimated  
308 rates and trends worldwide. *The Lancet* 2007;370:1338–1345.
- 309 [6] Abortion Worldwide 2017: Uneven Progress and Unequal Access  
310 *Abortion Worldwide 2017: Uneven Progress and Unequal Access* n.d.  
311 <http://clacaidigital.info/handle/123456789/1114> (accessed January 26, 2020).
- 312 [7] Ashok PW, Templeton A, Wagaarachchi PT, Flett GMM. Midtrimester medical  
313 termination of pregnancy: a review of 1002 consecutive cases. *Contraception*  
314 2004;69:51–58.
- 315 [8] Lohr PA, Hayes, JL, Gemzell-Danielsson K. Surgical versus medical methods for  
316 second trimester induced abortion. *Cochrane Database Syst Rev* 2008.  
317 <https://doi.org/10.1002/14651858.CD006714.pub2>.

- 318 [9] Harries J, Orner P, Gabriel M, Mitchell E. Delays in seeking an abortion until the  
319 second trimester: a qualitative study in South Africa. *Reprod Health* 2007;4:7.
- 320 [10] Mulat A, Bayu H, Mellie H, Alemu A. Induced second trimester abortion and  
321 associated factors in Amhara region referral hospitals. *BioMed Res Int* 2015;2015.
- 322 [11] Poon LCY, Parsons J. Audit of the effectiveness of cervical preparation with  
323 Dilapan prior to late second-trimester (20–24 weeks) surgical termination of  
324 pregnancy. *BJOG Int J Obstet Gynaecol* 2007;114:485–488.
- 325 [12] Whitley KA, Trinchere K, Prutsman W, Quiñones JN, Rochon ML. Midtrimester  
326 dilation and evacuation versus prostaglandin induction: a comparison of composite  
327 outcomes. *Am J Obstet Gynecol* 2011;205:386–e1.
- 328 [13] Mauelshagen A, Sadler LC, Roberts H, Harilall M, Farquhar CM. Audit of short  
329 term outcomes of surgical and medical second trimester termination of pregnancy.  
330 *Reprod Health* 2009;6:16.
- 331 [14] Bryant AG, Grimes DA, Garrett JM, Stuart GS. Second-trimester abortion for fetal  
332 anomalies or fetal death: labor induction compared with dilation and evacuation.  
333 *Obstet Gynecol* 2011;117:788–792.
- 334 [15] Grossman D, Constant D, Lince N, Alblas M, Blanchard K, Harries J. Surgical and  
335 medical second trimester abortion in South Africa: a cross-sectional study. *BMC*  
336 *Health Serv Res* 2011;11:224.
- 337 [16] The Criminal Code of the Federal Democratic Republic of Ethiopia 2004 n.d.:282.
- 338 [17] Health FDR of EM of. Technical and Procedural Guidelines for Safe Abortion  
339 Services in Ethiopia. FDRE-FHD Addis Ababa; 2006.



- 340 [18] Hurissa T, Bell J, Wondafrash M, Surur F, MacAfee L, Dalton V, et al. OUTCOMES  
341 OF SECOND TRIMESTER SURGICAL ABORTION: THE EXPERIENCE OF A  
342 TERTIARY HEALTH FACILITY IN ETHIOPIA. *Ethiop J Reprod Health* 2019;11:8–  
343 8.
- 344 [19] Robins J, Surrago EJ. Early midtrimester pregnancy termination. A comparison of  
345 dilatation and evacuation and intravaginal prostaglandin E2. *J Reprod Med*  
346 1982;27:415–419.
- 347 [20] Autry AM, Hayes EC, Jacobson GF, Kirby RS. A comparison of medical induction  
348 and dilation and evacuation for second-trimester abortion. *Am J Obstet Gynecol*  
349 2002;187:393–397.
- 350 [21] Edlow AG, Hou MY, Maurer R, Benson C, Delli-Bovi L, Goldberg AB. Uterine  
351 evacuation for second-trimester fetal death and maternal morbidity. *Obstet Gynecol*  
352 2011;117:307–316.
- 353 [22] Kelly T, Suddes J, Howel D, Hewison J, Robson S. Comparing medical versus  
354 surgical termination of pregnancy at 13–20 weeks of gestation: a randomised  
355 controlled trial. *BJOG Int J Obstet Gynaecol* 2010;117:1512–20.  
356 <https://doi.org/10.1111/j.1471-0528.2010.02712.x>.
- 357 [23] Kerns JL, Light A, Dalton V, McNamara B, Steinauer J, Kuppermann M. Decision  
358 satisfaction among women choosing a method of pregnancy termination in the  
359 setting of fetal anomalies and other pregnancy complications: A qualitative study.  
360 *Patient Educ Couns* 2018;101:1859–64. <https://doi.org/10.1016/j.pec.2018.06.012>.

361 [24] Robson D, Glen D, Vickery N, Watkins J, Faundez M. Thomson Orogen -  
362 development of an integrated geological/geophysical interpretation. ASEG Ext  
363 Abstr 2009;2009:1–8. <https://doi.org/10.1071/aseg2009ab093>.  
364

**Figure. 2 Post abortion family planning**

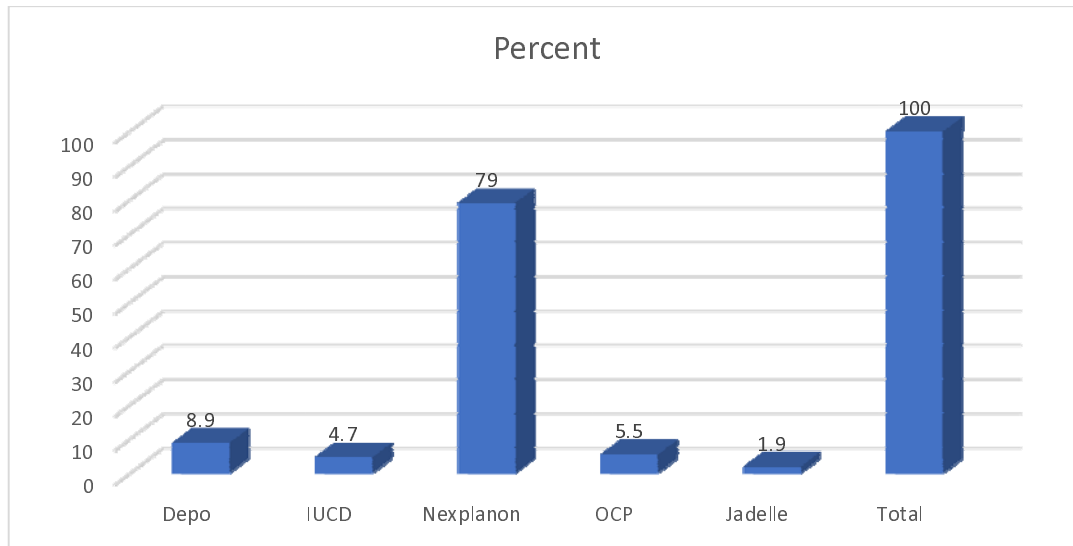

**Table 1. Baseline characteristics of study participants**

| <b>Characteristic</b>   | <b>Level</b>        | <b>Medical<br/>(n=219)</b> | <b>Surgical<br/>(n=60)</b> | <b>p-value</b> |
|-------------------------|---------------------|----------------------------|----------------------------|----------------|
| Age                     | 18-25               | 176 (80.4%)                | 38 (63.3%)                 | 0.008          |
|                         | 26-35               | 41 (18.7%)                 | 19 (31.7%)                 |                |
|                         | >35                 | 2 (0.9%)                   | 3 (5.0%)                   |                |
| Religion                | Muslim              | 34 (15.5%)                 | 8 (13.3%)                  | 0.92           |
|                         | Orthodox            | 146 (66.7%)                | 41 (68.3%)                 |                |
|                         | Protestant          | 39 (17.8%)                 | 11 (18.3%)                 |                |
| Income, median (IQR)    |                     | 1000 (700, 2500)           | 1500 (1000, 2750)          | 0.14           |
| Current residence       | Addis Ababa         | 176 (80.4%)                | 38 (63.3%)                 | 0.006          |
|                         | Outside Addis Ababa | 43 (19.6%)                 | 22 (36.7%)                 |                |
| Accompanying partner    | No                  | 180 (82.2%)                | 43 (71.7%)                 | 0.071          |
|                         | Yes                 | 39 (17.8%)                 | 17 (28.3%)                 |                |
| Level of education      | No formal education | 18 (8.2%)                  | 6 (10.0%)                  | 0.42           |
|                         | Grade 1-8 complete  | 91 (41.6%)                 | 19 (31.7%)                 |                |
|                         | Grade 8-12 complete | 78 (35.6%)                 | 22 (36.7%)                 |                |
|                         | College graduate    | 32 (14.6%)                 | 13 (21.7%)                 |                |
| Gestational age (weeks) | 13-15.6             | 68 (31.1%)                 | 26 (43.3%)                 | 0.20           |
|                         | 16-17.6             | 47 (21.5%)                 | 11 (18.3%)                 |                |
|                         | 18-20.6             | 104 (47.5%)                | 23 (38.3%)                 |                |
| Previous abortion       | No                  | 205 (93.6%)                | 52 (86.7%)                 | 0.077          |
|                         | Yes                 | 14 (6.4%)                  | 8 (13.3%)                  |                |
| Prior delivery          | No                  | 160 (73%)                  | 33 (55%)                   | 0.008          |
|                         | Yes                 | 59 (27%)                   | 27 (45%)                   |                |



**Table 2 Pain medication used during surgical abortions**

| Type of pain medication                 | Number | Percentage (%) |
|-----------------------------------------|--------|----------------|
| Paracervical block (PCB) only           | 7      | 11.7%          |
| PCB + Diclofenac                        | 37     | 61.7%          |
| PCB + Diclofenac + Diazepam + Pethidine | 10     | 16.7%          |
| PCB + Diclofenac +Diazepam              | 5      | 8.3%           |
| PCB + Diclofenac + Pethidine            | 1      | 1.7%           |

**Table 3. Procedure details and complications of study participants**

| <b>Factor</b>                                   | <b>Medical<br/>(n=219)</b> | <b>Surgical<br/>(n=60)</b> | <b>p-value</b> |
|-------------------------------------------------|----------------------------|----------------------------|----------------|
| Composite complication                          | 33 (15%)                   | 6 (10%)                    | 0.52           |
| Observed for bleeding                           | 1 (0.5%)                   | 5 (8.3%)                   | 0.002          |
| Symptoms of pelvic infection                    | 21 (9.6%)                  | 1 (1.7%)                   | 0.055          |
| Continued bleeding for two weeks                | 84 (38.3%)                 | 21 (35%)                   | 0.65           |
| Duration of hospital stay (hours), median (IQR) | 24 (12,24)                 | 6 (4,6)                    | <0.001         |
| Pain scale-medical-surgical                     |                            |                            |                |
| No pain                                         | 0                          | 5 (8.3%)                   | <0.001         |
| Mild pain                                       | 48 (21.9%)                 | 42 (70.0%)                 |                |
| Moderate pain                                   | 117 (53.4%)                | 11 (18.3%)                 |                |
| Severe pain                                     | 54 (24.7%)                 | 2 (3.3%)                   |                |
| Would recommend to others                       | 184 (84.0%)                | 59 (98.3%)                 | 0.003          |

**Table 4. Multiple Logistic regression analysis of composite complication**

| <b>Variables</b>          | <b>Composite Complication*<br/>N (%)</b> | <b>Adjusted OR</b> | <b>95% CI</b> |
|---------------------------|------------------------------------------|--------------------|---------------|
| <b>Method of abortion</b> |                                          |                    |               |
| Medical                   | 30 (83.3%)                               | 1.00               |               |
| Surgical                  | 6 (16.7%)                                | 0.46               | 0.16-1.3      |
| <b>Age</b>                |                                          |                    |               |
| 18-25                     | 27 (75.0%)                               | 1.00               |               |
| 26-35                     | 8 (22.2%)                                | 1.44               | 0.49-4.2      |
| >=36                      | 1 (2.8%)                                 | 2.64               | 0.22-32.2     |
| <b>Gestational age</b>    |                                          |                    |               |
| 13-15.6                   | 20 (55.6%)                               | 1.00               |               |
| 16-17.6                   | 4 (11.1%)                                | 0.22               | 0.07-0.72     |
| 18-20.6                   | 12 (33.3%)                               | 0.37               | 0.17-0.82     |
| <b>Previous abortion</b>  |                                          |                    |               |
| No                        | 32 (88.9%)                               | 1.00               |               |
| Yes                       | 4 (11.1%)                                | 2.39               | 0.6-9.1       |
| <b>Parity</b>             |                                          |                    |               |
| 0                         | 26 (72.2%)                               | 1.00               |               |
| 1                         | 3 (8.3%)                                 | 0.26               | 0.06-1.1      |
| >=2                       | 7 (19.4%)                                | 1.01               | 0.32-3.2      |

\*composite complication (observation for bleeding, one or more symptoms of infection, additional procedures required to complete the abortion). Those having one or more symptoms are considered as having complication (coded as; Yes=1, No=0).
